# Supplementary material
Source: Research Square preprint supplement (doi:10.21203/rs.3.rs-9134978/v1)
Supplement: Supplementary file 1 [file c08fbcb87c92f99308baa873.docx]

**Appendix Table 1: Explanation of the Institutional Embedding Index Construction**

This paper constructed an institutional embedding index (values 0–3) based on three binary/ordinal variables: 1) Whether a permanent coordinating body is retained after the Games (Yes = 1); 2) Whether the emergency or digital governance platform continues to operate (Yes = 1); 3) Whether the proportion of fiscal expenditure related to sports, culture, and resilience has increased by more than 10% (empirical thresholds designed to capture policy interventions that deviate significantly from normal spending levels) compared to before the Games (Yes = 1). This index was used to replace explanatory variables in auxiliary regression, and the result is still significantly positive (β = 0.182, p < 0.05), supporting the institutional explanatory path of the main conclusion, as shown in Table 1:

Table 1. Institutional Embedding Index-Assisted Regression Results

| Variables | (1) Baseline DID | (2) Join IEI | (3) Only IEI |
| --- | --- | --- | --- |
|  | 0.214*** | 0.167** | - |
| 0.062 | 0.068 |  |
| IEI | - | 0.182** | 0.209*** |
| - | 0.076 | 0.071 |
|  | Yes | Yes | Yes |
| City FE | Yes | Yes | Yes |
| Year FE | Yes | Yes | Yes |
| Observations | 2583 | 2583 | 2583 |
| R² | 0.432 | 0.451 | 0.447 |

**Appendix Table 2: Sensitivity Test Constructed by IEI**

Given that the "fiscal share > 10%" criterion in the IEI construction may affect the classification results, this paper further examines the estimation stability under different thresholds. The treatment groups were reconstructed after adjusting the thresholds to the more lenient 5% and the more stringent 15%, respectively. The results show that the coefficient sign, significance level, and economic meaning remain stable, indicating that the specific construction method of IEI found in this paper has strong robustness. As shown in Table 2:

Table 2.Sensitivity test results constructed using IEI

| Variables | (1) Benchmark setting | (2) Threshold = 5% | (3) Threshold = 15% |
| --- | --- | --- | --- |
| IEI | 0.182*** | 0.167*** | 0.195*** |
| 0.076 | 0.029 | 0.033 |
|  | Yes | Yes | Yes |
| City FE | Yes | Yes | Yes |
| Year FE | Yes | Yes | Yes |
| Observations | 2583 | 2583 | 2583 |
| R² | 0.451 | 0.448 | 0.457 |

**Appendix Table 3: Instrumental Variable Balance Test**

Table 3. Instrumental Variable Balance Test Results

| Variables | IV=1 mean | IV=0 mean | Difference | p-value |
| --- | --- | --- | --- | --- |
| Population (10,000s) | 582 | 567 | 15 | 0.62 |
| GDP per capita (10,000 yuan) | 6.8 | 6.5 | 0.3 | 0.41 |
| Fiscal self-sufficiency rate (%) | 52.1 | 49.8 | 2.3 | 0.38 |
| Government efficiency index | 0.61 | 0.59 | 0.02 | 0.55 |

**Appendix Table 4: Placebo Test**

Table 4. Placebo Test Results

| Dependent Variables: | IV estimation coefficient | SE | p-value |
| --- | --- | --- | --- |
| AQI (Standardized) | –0.021 | 0.051 | 0.67 |
| Criminal Offense Rate (per 10,000 people) | 0.034 | 0.043 | 0.42 |

**Appendix Table 5: Early Control Variables**

Table 5. IV Estimation Results after Incorporating Historical Control Variables from Before 2000 Years Ago

| Variables | Phase 1 | Phase 2 |
| --- | --- | --- |
|  | - | 0.203** |
| **-** | 0.089 |
| Instrumental variable: Experience in organizing the Games before 2000 | 0.376*** | - |
| 0.085 | **-** |
| Historical control variables before 2000 years ago: | **-** | **-** |
| Average population (10,000s, logarithm) | -0.012 | -0.008 |
| 0.018 | 0.007 |
| Average total industrial output (100 million yuan, logarithm) | 0.024 | 0.015 |
| 0.021 | 0.009 |
| Average local government revenue (100 million yuan, logarithm) | 0.031* | 0.019** |
| 0.017 | 0.008 |
| Whether it is a provincial capital or a city with independent planning status (Yes = 1) | 0.182** | 0.042 |
| 0.076 | 0.031 |
|  | Yes | Yes |
| City FE | Yes | Yes |
| Year FE | Yes | Yes |
| Phase 1 F-statistic | 16.84 | - |
| Kleibergen-Paap rk Wald F-statistic | 15.92 | - |
| Observations | 2583 | 2583 |
| R² (Phase 2) | - | 0.751 |

**Appendix Table 6: PSM Matching Covariate Balance Test**

Table 6. PSM Matching Covariate Balance Test Results

| Covariates | SD before matching (%) | SD after matching (%) | Post-match t-test (p-value) |
| --- | --- | --- | --- |
| GDP per capita (10,000 yuan) | 28.4 | 3.1 | 0.42 |
| Fiscal self-sufficiency rate (%) | 22.7 | 2.8 | 0.51 |
| Resident population (10,000 people, logarithm) | 19.5 | 1.9 | 0.67 |
| Secondary industry share (%) | 15.2 | 4.3 | 0.28 |
| Government efficiency index | 24.6 | 3.7 | 0.39 |
| Whether it is a provincial capital/city with independent planning status | 31.8 | 2.5 | 0.58 |
| Number of students enrolled in higher education (10,000 people) | 20.3 | 4.0 | 0.33 |
| Public fiscal expenditure (100 million yuan, logarithm) | 26.1 | 3.4 | 0.45 |

**Appendix: Explanation of Sports Event Data**

To ensure the accuracy, representativeness, and comparability of sports event data, the screening and classification rules adopted in this study are as follows:

(1) Inclusion criteria: Events must be at the provincial level or above (including provincial, national, and international levels); the events must have been held between January 1, 2014, and December 31, 2022;

(2) Level classification and weight assignment: International level (weight=3): Events hosted or certified by international sports organizations, or events with transnational participation; National level (weight=2): Events hosted by the General Administration of Sport of China or central ministries, or events listed in the national sports event directory; Provincial level (weight=1): Events hosted by provincial governments or sports bureaus, covering the entire province.

The main data sources include the *China Sports Yearbook* (2014–2022), event announcements on the official website of the General Administration of Sport of China, and annual reports from provincial and municipal sports bureaus; all event information has been cross-checked to ensure consistency in name, time, and location. Table 7 lists representative events held in the sample cities of this study between 2014 and 2022:

Table 7.Sports Event Organization

| City | Event Name | Year | Level | Weight |
| --- | --- | --- | --- | --- |
| Beijing | 2022 Winter Olympic Games | 2022 | International level | 3 |
| Nanjing | 2014 Summer Youth Olympic Games | 2014 | International level | 3 |
| Wuhan | 2019 FIBA ​​Basketball World Cup | 2019 | International level | 3 |
| Chengdu | 2021 Summer Universiade | 2021 | International level | 3 |
| Guangzhou | 2019 International Marathon | 2019 | International level | 3 |
| Shanghai | 2019 Formula 1 Chinese Grand Prix | 2019 | International level | 3 |
| Shenyang | THE 13TH GAMES OF LIAONING PROVINCE | 2018 | Provincial level | 1 |
| Xi'an | The 14th National Games of China in 2021 | 2021 | National level | 2 |
| Shanghai | 2018 Shanghai International Marathon | 2018 | International level | 3 |

**Appendix Table 8: Robustness Tests for Recovery Period Cutoff**

Table 8.Robustness Test Results of Recovery Period Cutoff

| Variables | Alternative settings |
| --- | --- |
| (5-year window, not restored = 0) |
|  | 0.176*** |
| 0.03 |
|  | Yes |
| City FE | Yes |
| Year FE | Yes |
| Observations | 2583 |
| *R2* | 0.409 |

Note: The dependent variable in this table is a binary recovery index constructed based on a five-year recovery window ("no recovery within five years =0"), which differs from the continuous resilience index in the baseline model in terms of measurement scale, construction method, and economic meaning. Therefore, its regression coefficient (=0.176) cannot be directly compared numerically with the coefficient (0.036) in the baseline model. This test aims to verify whether the sign and statistical significance of the treatment effect are robust under different definitions of recovery, rather than comparing effect sizes.

**Appendix Table 9. Robustness Tests of Mechanisms Using Two-Digit Industry Diversity Indicators**

Table 9. Robustness Test Results Using Two-Digit Industry Diversity Indicators

| Variables | (1) 1/HHI | (2) Entropy index |
| --- | --- | --- |
|  | 0.112*** | 0.121*** |
| 0.028 | 0.028 |
|  | 0.297** | 0.315** |
| 0.132 | 0.136 |
|  | 0.079*** | 0.082*** |
| 0.020 | 0.024 |
|  | Yes | Yes |
| City FE | Yes | Yes |
| Year FE | Yes | Yes |
| Observations | 2583 | 2583 |
| *R2* | 0.425 | 0.426 |

**Appendix: Illustrative Example for Determining Trough and Half-Recovery Year**

To illustrate the calculation process of the resilience index, this paper provides a simplified example:

Assume that the actual GDP growth rate of a certain city drops to 2.0% in the trough year =2020. At the same time, the GDP growth trend value of the city in 2020, calculated by HP filtering, is 5.0%. According to the definition in formula (3), the "half-recovery target" of the city is: + 0.5 × ( − ) = 2.0% + 0.5 × (5.0% − 2.0%) = 3.5%. If the actual GDP growth rate of the city reaches or exceeds 3.5% in 2021, then =2021, and its resilience score is 1/(2021−2020+1) = 0.5. If, by 2023 (i.e., the end of the three-year window period), its actual GDP growth rate still has not reached 3.5%, then .
